# Supplementary material
Source: PubMed Central journal article supplement (PMC5501309)
Supplement: NIHMS854944-supplement-Supporting_information.pdf [file NIHMS854944-supplement-Supporting_information.pdf]

**SUPPLEMENTARY MATERIAL**

**SUPPLEMENTARY FIGURE 1. Analytic Cohort of WHI-OS+CT**

**Legend. Final analytic cohort size of the WHI OS+CT cohort for main analyses after exclusion criteria**

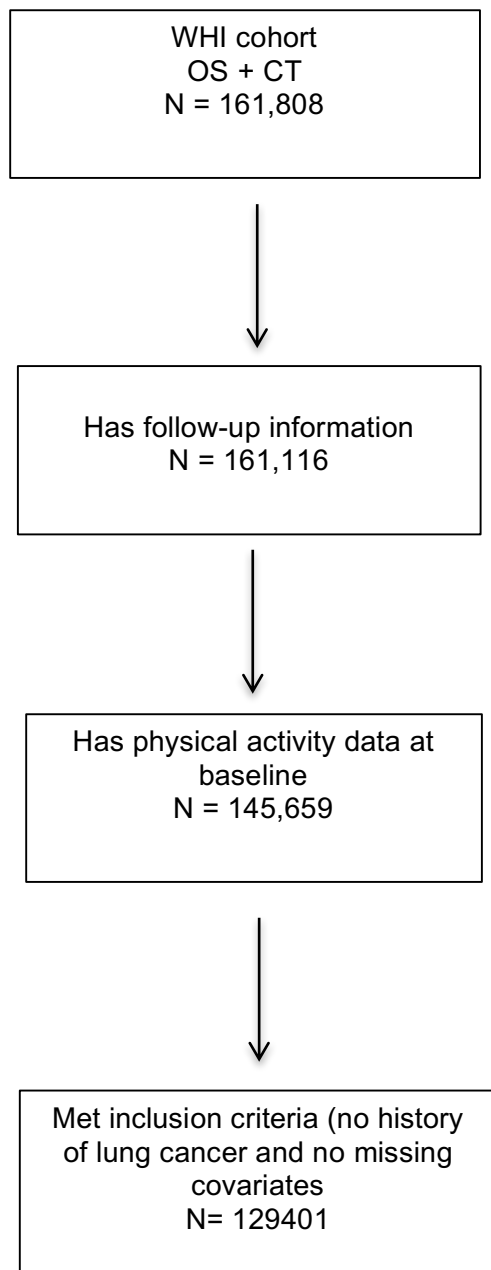

*Lung Cancer and Physical Activity in the Women's Health Initiative*

**Supplementary Table 1: WHI-OS only, physical activity**

**Legend. Baseline characteristics of the WHI-OS only cohort for physical activity analyses**

| Variable                          | Total physical activity in MET hours per week at baseline |                |                |                | p-value |
|-----------------------------------|-----------------------------------------------------------|----------------|----------------|----------------|---------|
|                                   | 0-<100                                                    | 100-<500       | 500-<1200      | 1200+          |         |
| <i>Total</i>                      | 14632                                                     | 20679          | 22868          | 19272          |         |
| <i>Age at baseline</i>            |                                                           |                |                |                | <.0001  |
| <50-59                            | 4890<br>33.42                                             | 6488<br>31.37  | 7134<br>31.20  | 6389<br>33.15  |         |
| 60-69                             | 6235<br>42.61                                             | 9006<br>43.55  | 10265<br>44.89 | 8715<br>45.22  |         |
| 70-79+                            | 3507<br>23.97                                             | 5185<br>25.07  | 5469<br>23.92  | 4168<br>21.63  |         |
| <i>Age at baseline</i>            |                                                           |                |                |                | <.0001  |
| Age in years                      | 63.39<br>7.44                                             | 63.72<br>7.41  | 63.67<br>7.28  | 63.19<br>7.22  |         |
| <i>Race/ethnicity</i>             |                                                           |                |                |                | <.0001  |
| American Indian or Alaskan Native | 77<br>0.53                                                | 82<br>0.40     | 65<br>0.28     | 70<br>0.36     |         |
| Asian or Pacific Islander         | 438<br>2.99                                               | 607<br>2.94    | 666<br>2.91    | 577<br>2.99    |         |
| Black or African-American         | 1560<br>10.66                                             | 1658<br>8.02   | 1275<br>5.58   | 938<br>4.87    |         |
| Hispanic/Latino                   | 633<br>4.33                                               | 763<br>3.69    | 569<br>2.49    | 496<br>2.57    |         |
| White (not of Hispanic origin)    | 11755<br>80.34                                            | 17336<br>83.83 | 20065<br>87.74 | 16997<br>88.20 |         |
| Other                             | 169<br>1.16                                               | 233<br>1.13    | 228<br>1.00    | 194<br>1.01    |         |
| <i>BMI at baseline</i>            |                                                           |                |                |                | <.0001  |
| <25                               | 4032<br>27.56                                             | 7502<br>36.28  | 10291<br>45.00 | 10281<br>53.35 |         |
| 25-<30                            | 4752<br>32.48                                             | 7254<br>35.08  | 7949<br>34.76  | 6323<br>32.81  |         |
| 30+                               | 5848<br>39.97                                             | 5923<br>28.64  | 4628<br>20.24  | 2668<br>13.84  |         |
| <i>BMI at baseline</i>            |                                                           |                |                |                | <.0001  |
| BMI                               | 29.53<br>6.85                                             | 27.75<br>5.89  | 26.53<br>5.27  | 25.54<br>4.75  |         |
| <i>Education</i>                  |                                                           |                |                |                | <.0001  |

*Lung Cancer and Physical Activity in the Women's Health Initiative*

|                                                        |       |       |       |        |
|--------------------------------------------------------|-------|-------|-------|--------|
| Primary                                                | 328   | 309   | 192   | 139    |
|                                                        | 2.24  | 1.49  | 0.84  | 0.72   |
| Some HS                                                | 764   | 768   | 488   | 376    |
|                                                        | 5.22  | 3.71  | 2.13  | 1.95   |
| HS                                                     | 3280  | 3723  | 3294  | 2229   |
|                                                        | 22.42 | 18.00 | 14.40 | 11.57  |
| Some college                                           | 5691  | 7833  | 8103  | 6547   |
|                                                        | 38.89 | 37.88 | 35.43 | 33.97  |
| College                                                | 1343  | 2228  | 2897  | 2588   |
|                                                        | 9.18  | 10.77 | 12.67 | 13.43  |
| Graduate                                               | 3226  | 5818  | 7894  | 7393   |
|                                                        | 22.05 | 28.13 | 34.52 | 38.36  |
| <i>History of cancer</i>                               |       |       |       | 0.0004 |
| No history of cancer                                   | 12687 | 17991 | 20049 | 16967  |
|                                                        | 86.71 | 87.00 | 87.67 | 88.04  |
| History of cancer                                      | 1945  | 2688  | 2819  | 2305   |
|                                                        | 13.29 | 13.00 | 12.33 | 11.96  |
| <i>History of asthma</i>                               |       |       |       | <.0001 |
| No history of asthma                                   | 13242 | 19100 | 21143 | 17880  |
|                                                        | 90.50 | 92.36 | 92.46 | 92.78  |
| History of asthma                                      | 1390  | 1579  | 1725  | 1392   |
|                                                        | 9.50  | 7.64  | 7.54  | 7.22   |
| <i>History of emphysema or chronic bronchitis</i>      |       |       |       | <.0001 |
| No history of emphysema or chronic bronchitis          | 13793 | 19864 | 22136 | 18739  |
|                                                        | 94.27 | 96.06 | 96.80 | 97.23  |
| History of emphysema or chronic bronchitis             | 839   | 815   | 732   | 533    |
|                                                        | 5.73  | 3.94  | 3.20  | 2.77   |
| <i>Vitamin D from diet and supplements at baseline</i> |       |       |       | <.0001 |
| <400 IU                                                | 8720  | 11425 | 11375 | 9184   |
|                                                        | 59.60 | 55.25 | 49.74 | 47.65  |
| >=400 IU                                               | 5912  | 9254  | 11493 | 10088  |
|                                                        | 40.40 | 44.75 | 50.26 | 52.35  |
| <i>Main occupation (Missing N=2591)</i>                |       |       |       | <.0001 |

*Lung Cancer and Physical Activity in the Women's Health Initiative*

|                                          |               |                |                |               |        |
|------------------------------------------|---------------|----------------|----------------|---------------|--------|
| Managerial / Professional                | 4998<br>35.57 | 8294<br>41.51  | 10440<br>47.14 | 9345<br>50.03 |        |
| Technical / Sales / Admin                | 4610<br>32.81 | 6198<br>31.02  | 6118<br>27.62  | 4631<br>24.80 |        |
| Service / Labor                          | 2890<br>20.57 | 3456<br>17.30  | 3366<br>15.20  | 2815<br>15.07 |        |
| Homemaker only                           | 1554<br>11.06 | 2034<br>10.18  | 2225<br>10.05  | 1886<br>10.10 |        |
| <i>Alcohol consumption at baseline</i>   |               |                |                |               | <.0001 |
| Non drinker                              | 2176<br>14.87 | 2589<br>12.52  | 2306<br>10.08  | 1480<br>7.68  |        |
| Past drinker                             | 3523<br>24.08 | 4092<br>19.79  | 3651<br>15.97  | 2923<br>15.17 |        |
| <1 drink per month                       | 2188<br>14.95 | 2565<br>12.40  | 2611<br>11.42  | 1797<br>9.32  |        |
| <1 drink per week                        | 2806<br>19.18 | 4264<br>20.62  | 4710<br>20.60  | 3896<br>20.22 |        |
| 1 to <7 drinks per week                  | 2578<br>17.62 | 4969<br>24.03  | 6447<br>28.19  | 6094<br>31.62 |        |
| 7+ drinks per week                       | 1361<br>9.30  | 2200<br>10.64  | 3143<br>13.74  | 3082<br>15.99 |        |
| <i>Smoking status</i>                    |               |                |                |               | <.0001 |
| Never smoker                             | 7619<br>52.07 | 11150<br>53.92 | 11863<br>51.88 | 9629<br>49.96 |        |
| Former smoker, ≤3 cigarettes/day         | 2846<br>19.45 | 4430<br>21.42  | 5525<br>24.16  | 5000<br>25.94 |        |
| Former smoker, 4-7 cigarettes/day        | 2716<br>18.56 | 3588<br>17.35  | 4354<br>19.04  | 3889<br>20.18 |        |
| Current smoker                           | 1451<br>9.92  | 1511<br>7.31   | 1126<br>4.92   | 754<br>3.91   |        |
| <i>Red meat consumption at baseline</i>  |               |                |                |               | <.0001 |
| Servings/day                             | 0.74<br>0.68  | 0.64<br>0.56   | 0.56<br>0.51   | 0.49<br>0.47  |        |
| <i>Fruit consumption at baseline</i>     |               |                |                |               | <.0001 |
| Servings/day                             | 1.61<br>1.19  | 1.91<br>1.24   | 2.14<br>1.25   | 2.37<br>1.34  |        |
| <i>Vegetable consumption at baseline</i> |               |                |                |               | <.0001 |
| Servings/day                             | 1.85<br>1.17  | 2.14<br>1.26   | 2.36<br>1.32   | 2.65<br>1.45  |        |

*Lung Cancer and Physical Activity in the Women's Health Initiative*

|                                                                               |                |                |                |                |                  |
|-------------------------------------------------------------------------------|----------------|----------------|----------------|----------------|------------------|
| <i>Hormone therapy use at baseline</i>                                        |                |                |                |                | <i>&lt;.0001</i> |
| Never used                                                                    | 6402<br>43.75  | 8653<br>41.84  | 8706<br>38.07  | 7091<br>36.79  |                  |
| Past user                                                                     | 2219<br>15.17  | 3105<br>15.02  | 3380<br>14.78  | 2760<br>14.32  |                  |
| Current user                                                                  | 6011<br>41.08  | 8921<br>43.14  | 10782<br>47.15 | 9421<br>48.88  |                  |
| <i>Oral contraceptive use ever at baseline</i>                                |                |                |                |                | <i>&lt;.0001</i> |
| No                                                                            | 8815<br>60.24  | 12509<br>60.49 | 13449<br>58.81 | 10989<br>57.02 |                  |
| Yes                                                                           | 5817<br>39.76  | 8170<br>39.51  | 9419<br>41.19  | 8283<br>42.98  |                  |
| <i>Incident lung cancer during main trial</i>                                 |                |                |                |                | <i>&lt;.0001</i> |
| No                                                                            | 14322<br>97.88 | 20348<br>98.40 | 22517<br>98.47 | 18962<br>98.39 |                  |
| Yes                                                                           | 310<br>2.12    | 331<br>1.60    | 351<br>1.53    | 310<br>1.61    |                  |
| <i>Death during main trial</i>                                                |                |                |                |                | <i>&lt;.0001</i> |
| No                                                                            | 12411<br>84.82 | 18047<br>87.27 | 20403<br>89.22 | 17470<br>90.65 |                  |
| Yes                                                                           | 2221<br>15.18  | 2632<br>12.73  | 2466<br>10.78  | 1802<br>9.35   |                  |
| <i>Death due to lung cancer after lung cancer diagnosis during main trial</i> |                |                |                |                | <i>&lt;.0001</i> |
| No                                                                            | 14414<br>98.51 | 20474<br>99.01 | 22673<br>99.15 | 19095<br>99.08 |                  |
| Yes                                                                           | 218<br>1.49    | 205<br>0.99    | 195<br>0.85    | 177<br>0.92    |                  |
| <i>HT Trial Arm</i>                                                           |                |                |                |                |                  |
| Not randomized to HRT                                                         | 14632          | 20679          | 22868          | 19272          |                  |
| <i>CaD Trial Arm</i>                                                          |                |                |                |                |                  |
| Not randomized to CaD                                                         | 14632          | 20679          | 22868          | 19272          |                  |
| <i>DM Trial Arm</i>                                                           |                |                |                |                |                  |
| Not randomized to DM                                                          | 14632          | 20679          | 22868          | 19272          |                  |

Note: WHI Cohort N=161808 → OS only N=93676 → Has follow-up data N=93205 → Has physical activity data at baseline N=87407 → meet inclusion criteria (no history of lung cancer and no missing covariates) N=77451

*Lung Cancer and Physical Activity in the Women's Health Initiative*

**Supplementary Table 2: WHI-OS only, sedentary behavior**

**Legend: Baseline characteristics of the WHI-OS only cohort for sedentary behavior analyses**

| Variable                          | Sedentary behavior in sitting hours per day at baseline |                |                | p-value |
|-----------------------------------|---------------------------------------------------------|----------------|----------------|---------|
|                                   | 0-5                                                     | 6-<10          | >=10           |         |
| <i>Total</i>                      | 27738                                                   | 33044          | 19799          |         |
| <i>Age at baseline</i>            |                                                         |                |                | <.0001  |
| <50-59                            | 7672<br>27.66                                           | 9340<br>28.27  | 8724<br>44.06  |         |
| 60-69                             | 12846<br>46.31                                          | 14982<br>45.34 | 7738<br>39.08  |         |
| 70-79+                            | 7220<br>26.03                                           | 8722<br>26.40  | 3337<br>16.85  |         |
| <i>Age at baseline</i>            |                                                         |                |                | <.0001  |
| Age in years                      | 64.24<br>7.17                                           | 64.20<br>7.26  | 61.53<br>7.36  |         |
| <i>Race/ethnicity</i>             |                                                         |                |                | <.0001  |
| American Indian or Alaskan Native | 142<br>0.51                                             | 115<br>0.35    | 67<br>0.34     |         |
| Asian or Pacific Islander         | 766<br>2.76                                             | 974<br>2.95    | 655<br>3.31    |         |
| Black or African-American         | 2434<br>8.77                                            | 2107<br>6.38   | 1524<br>7.70   |         |
| Hispanic/Latino                   | 1406<br>5.07                                            | 862<br>2.61    | 502<br>2.54    |         |
| White (not of Hispanic origin)    | 22656<br>81.68                                          | 28632<br>86.65 | 16871<br>85.21 |         |
| Other                             | 334<br>1.20                                             | 354<br>1.07    | 180<br>0.91    |         |
| <i>BMI at baseline</i>            |                                                         |                |                | <.0001  |
| <25                               | 12278<br>44.26                                          | 13639<br>41.28 | 7294<br>36.84  |         |
| 25-<30                            | 9620<br>34.68                                           | 11340<br>34.32 | 6409<br>32.37  |         |
| 30+                               | 5840<br>21.05                                           | 8065<br>24.41  | 6096<br>30.79  |         |
| <i>BMI at baseline</i>            |                                                         |                |                | <.0001  |
| BMI                               | 26.60<br>5.32                                           | 27.16<br>5.71  | 28.14<br>6.52  |         |
| <i>Education</i>                  |                                                         |                |                | <.0001  |

*Lung Cancer and Physical Activity in the Women's Health Initiative*

|                                                        |                |                |                |        |
|--------------------------------------------------------|----------------|----------------|----------------|--------|
| Primary                                                | 662<br>2.39    | 327<br>0.99    | 132<br>0.67    |        |
| Some HS                                                | 1296<br>4.67   | 978<br>2.96    | 391<br>1.97    |        |
| HS                                                     | 4926<br>17.76  | 5451<br>16.50  | 2763<br>13.96  |        |
| Some college                                           | 10439<br>37.63 | 11931<br>36.11 | 7079<br>35.75  |        |
| College                                                | 3067<br>11.06  | 3876<br>11.73  | 2399<br>12.12  |        |
| Graduate                                               | 7348<br>26.49  | 10481<br>31.72 | 7035<br>35.53  |        |
| <i>History of cancer</i>                               |                |                |                | 0.301  |
| No history of cancer                                   | 24307<br>87.63 | 28820<br>87.22 | 17318<br>87.47 |        |
| History of cancer                                      | 3431<br>12.37  | 4224<br>12.78  | 2481<br>12.53  |        |
| <i>History of asthma</i>                               |                |                |                | <.0001 |
| No history of asthma                                   | 25769<br>92.90 | 30472<br>92.22 | 18015<br>90.99 |        |
| History of asthma                                      | 1969<br>7.10   | 2572<br>7.78   | 1784<br>9.01   |        |
| <i>History of emphysema or chronic bronchitis</i>      |                |                |                | 0.002  |
| No history of emphysema or chronic bronchitis          | 26758<br>96.47 | 31805<br>96.25 | 18975<br>95.84 |        |
| History of emphysema or chronic bronchitis             | 980<br>3.53    | 1239<br>3.75   | 824<br>4.16    |        |
| <i>Vitamin D from diet and supplements at baseline</i> |                |                |                | <.0001 |
| <400 IU                                                | 15019<br>54.15 | 17005<br>51.46 | 10610<br>53.59 |        |
| >=400 IU                                               | 12719<br>45.85 | 16039<br>48.54 | 9189<br>46.41  |        |
| <i>Main occupation (Missing N=2837)</i>                |                |                |                | <.0001 |

*Lung Cancer and Physical Activity in the Women's Health Initiative*

|                                          |                |                |               |
|------------------------------------------|----------------|----------------|---------------|
| Managerial / Professional                | 10438<br>39.25 | 14141<br>44.29 | 9358<br>48.68 |
| Technical / Sales / Admin                | 6719<br>25.26  | 9164<br>28.70  | 6484<br>33.73 |
| Service / Labor                          | 5793<br>21.78  | 5142<br>16.11  | 2308<br>12.01 |
| Homemaker only                           | 3646<br>13.71  | 3478<br>10.89  | 1073<br>5.58  |
| <i>Alcohol consumption at baseline</i>   |                |                | <.0001        |
| Non drinker                              | 3895<br>14.04  | 3458<br>10.46  | 1710<br>8.64  |
| Past drinker                             | 5309<br>19.14  | 5925<br>17.93  | 3745<br>18.92 |
| <1 drink per month                       | 2970<br>10.71  | 3871<br>11.71  | 2634<br>13.30 |
| <1 drink per week                        | 5354<br>19.30  | 6695<br>20.26  | 4169<br>21.06 |
| 1 to <7 drinks per week                  | 6879<br>24.80  | 8790<br>26.60  | 5092<br>25.72 |
| 7+ drinks per week                       | 3331<br>12.01  | 4305<br>13.03  | 2449<br>12.37 |
| <i>Smoking status</i>                    |                |                | <.0001        |
| Never smoker                             | 15268<br>55.04 | 17239<br>52.17 | 9478<br>47.87 |
| Former smoker, ≤3 cigarettes/day         | 6652<br>23.98  | 7673<br>23.22  | 4235<br>21.39 |
| Former smoker, 4-7 cigarettes/day        | 4253<br>15.33  | 6132<br>18.56  | 4611<br>23.29 |
| Current smoker                           | 1565<br>5.64   | 2000<br>6.05   | 1475<br>7.45  |
| <i>Red meat consumption at baseline</i>  |                |                | <.0001        |
| Servings/day                             | 0.56<br>0.56   | 0.60<br>0.53   | 0.64<br>0.61  |
| <i>Fruit consumption at baseline</i>     |                |                | <.0001        |
| Servings/day                             | 2.06<br>1.33   | 2.05<br>1.27   | 1.95<br>1.27  |
| <i>Vegetable consumption at baseline</i> |                |                | <.0001        |
| Servings/day                             | 2.30<br>1.40   | 2.30<br>1.32   | 2.17<br>1.30  |



*Lung Cancer and Physical Activity in the Women's Health Initiative*

|                                                                               |                |                |                |
|-------------------------------------------------------------------------------|----------------|----------------|----------------|
| <i>Hormone therapy use at baseline</i>                                        |                |                | <.0001         |
| Never used                                                                    | 11278<br>40.66 | 13376<br>40.48 | 7647<br>38.62  |
| Past user                                                                     | 4177<br>15.06  | 5027<br>15.21  | 2758<br>13.93  |
| Current user                                                                  | 12283<br>44.28 | 14641<br>44.31 | 9394<br>47.45  |
| <i>Oral contraceptive use ever at baseline</i>                                |                |                | <.0001         |
| No                                                                            | 17339<br>62.51 | 20055<br>60.69 | 10504<br>53.05 |
| Yes                                                                           | 10399<br>37.49 | 12989<br>39.31 | 9295<br>46.95  |
| <i>Incident lung cancer during main trial</i>                                 |                |                | 0.002          |
| No                                                                            | 27339<br>98.56 | 32473<br>98.27 | 19440<br>98.19 |
| Yes                                                                           | 399<br>1.44    | 571<br>1.73    | 359<br>1.81    |
| <i>Death during main trial</i>                                                |                |                | 0.0001         |
| No                                                                            | 24650<br>88.87 | 29008<br>87.79 | 17431<br>88.04 |
| Yes                                                                           | 3088<br>11.13  | 4036<br>12.21  | 2368<br>11.96  |
| <i>Death due to lung cancer after lung cancer diagnosis during main trial</i> |                |                | 0.003          |
| No                                                                            | 27504<br>99.16 | 32687<br>98.92 | 19576<br>98.87 |
| Yes                                                                           | 234<br>0.84    | 357<br>1.08    | 223<br>1.13    |
| <i>HT Trial Arm</i>                                                           |                |                |                |
| Not randomized to HRT                                                         | 27738          | 33044          | 19799          |
| <i>CaD Trial Arm</i>                                                          |                |                |                |
| Not randomized to CaD                                                         | 27738          | 33044          | 19799          |
| <i>DM Trial Arm</i>                                                           |                |                |                |
| Not randomized to DM                                                          | 27738          | 33044          | 19799          |

Note: WHI Cohort N=161808 → OS only N=93676 → Has follow-up data N=93205 → Has siting time data at baseline N=92361 → meet inclusion criteria (no history of lung cancer and no missing covariates) N=80581

*Lung Cancer and Physical Activity in the Women's Health Initiative*

**Supplementary Table 3. Sensitivity Analysis with Smoking Status and Pack Years smoked - Cox Proportional Hazards Model of Time to Lung Cancer Incidence According to Amount of Current (Study Entry Physical Activity and Sedentary Behavior)**

Incident lung cancer, current (study entry) total physical activity (MET-min/wk)

| MET minutes per week | No. of cases | Unadjusted model   |                | Adjusted model*    |                |
|----------------------|--------------|--------------------|----------------|--------------------|----------------|
|                      |              | HR (95% CI)        | Global p-value | HR (95% CI)        | Global p-value |
| 0 - <100             | 581          | Ref.               | <0.0001        | Ref.               | 0.072          |
| 100 - <500           | 588          | 0.76 (0.68 – 0.85) |                | 0.89 (0.79 – 0.99) |                |
| 500 - <1200          | 535          | 0.68 (0.60 – 0.76) |                | 0.87 (0.77 – 0.98) |                |
| 1200+                | 444          | 0.72 (0.63 – 0.81) |                | 0.95 (0.83 – 1.09) |                |

Incident lung cancer, current (study entry) strenuous physical activity (MET-min/wk)

| MET minutes per week | No. of cases | Unadjusted model   |                | Adjusted model*    |                |
|----------------------|--------------|--------------------|----------------|--------------------|----------------|
|                      |              | HR (95% CI)        | Global p-value | HR (95% CI)        | Global p-value |
| 0 - <100             | 1675         | Ref.               | 0.049          | Ref.               | 0.162          |
| 100 - <500           | 155          | 0.83 (0.70 – 0.98) |                | 1.01 (0.85 – 1.19) |                |
| 500 - <1200          | 187          | 0.87 (0.75 – 1.02) |                | 1.06 (0.91 – 1.24) |                |
| 1200+                | 131          | 1.02 (0.86 – 1.22) |                | 1.23 (1.02 – 1.47) |                |

Incident lung cancer, current (study entry) moderate physical activity (MET-min/wk)

| MET minutes per week | No. of cases | Unadjusted model   |                | Adjusted model*    |                |
|----------------------|--------------|--------------------|----------------|--------------------|----------------|
|                      |              | HR (95% CI)        | Global p-value | HR (95% CI)        | Global p-value |
| 0 - <100             | 1388         | Ref.               | <0.0001        | Ref.               | 0.040          |
| 100 - <500           | 519          | 0.85 (0.77 – 0.94) |                | 1.01 (0.91 – 1.12) |                |
| 500 - <1200          | 185          | 0.76 (0.65 – 0.89) |                | 0.85 (0.73 – 1.00) |                |
| 1200+                | 56           | 1.18 (0.90 – 1.54) |                | 1.30 (0.99 – 1.70) |                |

Incident lung cancer, current (study entry) mild physical activity (MET-min/wk)

| MET minutes per week | No. of cases | Unadjusted model   |                | Adjusted model*    |                |
|----------------------|--------------|--------------------|----------------|--------------------|----------------|
|                      |              | HR (95% CI)        | Global p-value | HR (95% CI)        | Global p-value |
| 0 - <100             | 1702         | Ref.               | 0.742          | Ref.               | 0.751          |
| 100 - <500           | 348          | 0.96 (0.86 – 1.08) |                | 0.97 (0.86 – 1.08) |                |
| 500 - <1200          | 84           | 1.08 (0.86 – 1.34) |                | 0.95 (0.76 – 1.19) |                |
| 1200+                | 14           | 0.86 (0.51 – 1.45) |                | 0.79 (0.47 – 1.34) |                |

Incident lung cancer, current (study entry) sedentary behavior (sitting hrs/day)

| Sitting Time (hours/day) | No. of cases | Unadjusted model   |                | Adjusted model**   |                |
|--------------------------|--------------|--------------------|----------------|--------------------|----------------|
|                          |              | HR (95% CI)        | Global p-value | HR (95% CI)        | Global p-value |
| <=5                      | 399          | Ref.               | 0.017          | Ref.               | 0.610          |
| 6 - <10                  | 571          | 1.17 (1.03 – 1.33) |                | 1.07 (0.94 – 1.22) |                |
| >=10                     | 359          | 1.21 (1.05 – 1.39) |                | 1.04 (0.90 – 1.20) |                |

## *Lung Cancer and Physical Activity in the Women's Health Initiative*

\*\*All sedentary behavior adjusted models are adjusted for age, race/ethnicity, BMI, family history of cancer, personal history of cancer, history of asthma, history of emphysema or chronic bronchitis, smoking status, pack years smoked, education, alcohol intake, vitamin D use, hormone therapy, oral contraceptive use, hysterectomy status, NSAID use, servings of fruit, vegetables and red meat

Note: Please note that the women in the cohorts used for the sensitivity analyses are different from the cohorts used in the main analyses. The reason is due to the use of two different variables in the sensitivity analyses—smoking status and pack years smoked instead of the collapsed smoking categories that were used originally. Because the sensitivity analyses were also based on complete cases, any women with missing data on smoking status or pack years were excluded. The N for the combined CT + OS cohort is 129,401, and the N for the OS cohort is 80,581.

*Lung Cancer and Physical Activity in the Women's Health Initiative*

**Supplementary Table 4. Sensitivity Analysis with Smoking Status and Pack Years smoked - Cox Proportional Hazards Model of Time to Lung Cancer Mortality According to Amount of Current (Study Entry) Physical Activity and Sedentary Behavior**

| MET minutes per week | No. of cases | Unadjusted model   |                | Adjusted model*    |                |
|----------------------|--------------|--------------------|----------------|--------------------|----------------|
|                      |              | HR (95% CI)        | Global p-value | HR (95% CI)        | Global p-value |
| 0 - <100             | 412          | Ref.               | <0.0001        | Ref.               | 0.0008         |
| 100 - <500           | 382          | 0.70 (0.61 – 0.80) |                | 0.83 (0.72 – 0.95) |                |
| 500 - <1200          | 308          | 0.55 (0.47 – 0.64) |                | 0.73 (0.62 – 0.85) |                |
| 1200+                | 263          | 0.60 (0.51 – 0.70) |                | 0.83 (0.70 – 0.98) |                |

Lung cancer mortality, current (study entry) strenuous physical activity (MET-min/wk)

| MET minutes per week | No. of cases | Unadjusted model   |                | Adjusted model*    |                |
|----------------------|--------------|--------------------|----------------|--------------------|----------------|
|                      |              | HR (95% CI)        | Global p-value | HR (95% CI)        | Global p-value |
| 0 - <100             | 1102         | Ref.               | <0.0001        | Ref.               | 0.093          |
| 100 - <500           | 87           | 0.70 (0.57 – 0.88) |                | 0.88 (0.71 – 1.10) |                |
| 500 - <1200          | 95           | 0.67 (0.55 – 0.83) |                | 0.86 (0.69 – 1.06) |                |
| 1200+                | 81           | 0.96 (0.77 – 1.20) |                | 1.21 (0.96 – 1.52) |                |

Lung cancer mortality, current (study entry) moderate physical activity (MET-min/wk)

| MET minutes per week | No. of cases | Unadjusted model   |                | Adjusted model*    |                |
|----------------------|--------------|--------------------|----------------|--------------------|----------------|
|                      |              | HR (95% CI)        | Global p-value | HR (95% CI)        | Global p-value |
| 0 - <100             | 922          | Ref.               | <0.0001        | Ref.               | 0.006          |
| 100 - <500           | 301          | 0.74 (0.65 – 0.85) |                | 0.91 (0.80 – 1.04) |                |
| 500 - <1200          | 105          | 0.65 (0.53 – 0.80) |                | 0.75 (0.61 – 0.92) |                |
| 1200+                | 37           | 1.17 (0.84 – 1.62) |                | 1.33 (0.95 – 1.85) |                |

Lung cancer mortality, current (study entry) mild physical activity (MET-min/wk)

| MET minutes per week | No. of cases | Unadjusted model   |                | Adjusted model*    |                |
|----------------------|--------------|--------------------|----------------|--------------------|----------------|
|                      |              | HR (95% CI)        | Global p-value | HR (95% CI)        | Global p-value |
| 0 - <100             | 1081         | Ref.               | 0.955          | Ref.               | 0.907          |
| 100 - <500           | 222          | 0.97 (0.84 – 1.12) |                | 0.98 (0.85 – 1.13) |                |
| 500 - <1200          | 51           | 1.03 (0.77 – 1.36) |                | 0.90 (0.68 – 1.20) |                |
| 1200+                | 11           | 1.06 (0.59 – 1.92) |                | 0.99 (0.55 – 1.80) |                |

Lung cancer mortality, current (study entry) sedentary behavior (sitting hrs/day)

| Sitting Time (hours/day) | No. of cases | Unadjusted model   |                | Adjusted model**   |                |
|--------------------------|--------------|--------------------|----------------|--------------------|----------------|
|                          |              | HR (95% CI)        | Global p-value | HR (95% CI)        | Global p-value |
| <=5                      | 234          | Ref.               | 0.013          | Ref.               | 0.413          |
| 6 - <10                  | 357          | 1.25 (1.06 – 1.47) |                | 1.12 (0.95 – 1.32) |                |
| >=10                     | 223          | 1.27 (1.06 – 1.53) |                | 1.08 (0.89 – 1.30) |                |
